# Supplementary material for: Core spliceosomal Sm proteins as constituents of cytoplasmic mRNPs in plants
Source: bioRxiv or medRxiv preprint supplement (doi:10.1101/709550), 2019-12-06
Supplement: Supplementary file [file media-3.pdf]

**Supplementary Table 1 Identification of the proteins that formforming a complex with Sm proteins in the cytoplasm determined by IP-LC-MS / MS.**

| No. | locus                                                                   | protein                                                                     | score (# of unique peptides) |
|-----|-------------------------------------------------------------------------|-----------------------------------------------------------------------------|------------------------------|
| 1   | AT5G60160.1                                                             | Zn-dependent exopeptidases superfamily protein                              | 2076.0 (4)                   |
| 2   | AT4G02840.1,AT4G02840.2                                                 | Small nuclear ribonucleoprotein family protein D1b (SmD1b)                  | 1692.0 (5)                   |
| 3   | AT3G07590.1,AT3G07590.2                                                 | Small nuclear ribonucleoprotein family protein D1a (SmD1a)                  | 1551.0 (3)                   |
| 4   | AT1G03330.1                                                             | Small nuclear ribonucleoprotein family protein (LSM2)                       | 1153.0 (1)                   |
| 5   | AT4G37930.1                                                             | Serine transhydroxymethyltransferase 1 (SHM1, STM, SHMT1)                   | 1104.0 (10)                  |
| 6   | AT5G26780.1,AT5G26780.2,AT5G26780.3                                     | Serine hydroxymethyltransferase 2 (SHM2)                                    | 1104.0 (7)                   |
| 7   | AT1G76300.1                                                             | snRNP core protein (SmD3)                                                   | 1011.0 (3)                   |
| 8   | AT1G20580.1                                                             | Small nuclear ribonucleoprotein family protein D3b (SmD3b)                  | 1011.0 (2)                   |
| 9   | AT1G29250.1,AT2G34160.1                                                 | Alba DNA/RNA-binding protein                                                | 650.0 (4)                    |
| 10  | AT3G04620.1                                                             | Alba DNA/RNA-binding protein                                                | 650.0 (3)                    |
| 11  | AT3G13060.1,AT3G13060.2                                                 | Evolutionarily conserved C-terminal region 5 (ECT5)                         | 634.0 (3)                    |
| 12  | AT5G27720.1                                                             | Sm-like protein (LSM4)                                                      | 509.0 (3)                    |
| 13  | AT5G20320.1,AT5G20320.2                                                 | Dicer-like protein 4 (DCL4)                                                 | 496.0 (7)                    |
| 14  | AT2G36250.1,AT2G36250.2                                                 | Tubulin/FtsZ family protein (FTSZ2-1)                                       | 439.0 (5)                    |
| 15  | AT5G04710.1                                                             | Zn-dependent exopeptidases superfamily protein                              | 438.0 (5)                    |
| 16  | AT3G52750.1                                                             | Tubulin/FtsZ family protein (FTSZ2-2)                                       | 326.0 (3)                    |
| 17  | AT2G45290.1                                                             | Transketolase 2 (TKL2)                                                      | 290.0 (4)                    |
| 18  | AT1G26230.1                                                             | Chaperonin 60 subunit beta 4 (CPN-60 beta 4)                                | 273.0 (2)                    |
| 19  | AT1G26230.2                                                             | Chaperonin 60 subunit beta 4 (CPN-60 beta 4)                                | 273.0 (3)                    |
| 20  | AT4G00620.1                                                             | EMBRYO DEFECTIVE 3127 (EMB3127)                                             | 272.0 (2)                    |
| 21  | AT4G00600.1                                                             | EMBRYO DEFECTIVE 3127 (EMB3127)                                             | 272.0 (2)                    |
| 22  | AT4G20440.1,AT4G20440.2,AT4G20440.3,AT4G20440.4,AT5G44500.1,AT5G44500.2 | Small nuclear ribonucleoprotein family protein B (SmB)                      | 259.0 (3)                    |
| 23  | AT3G07920.1                                                             | Translation initiation factor IF2/IF5                                       | 258.0 (2)                    |
| 24  | AT2G04842.1                                                             | EMBRYO DEFECTIVE 2761 (EMB2761)                                             | 248.0 (4)                    |
| 25  | AT3G43190.1                                                             | SUCROSE SYNTHASE 4 (SUS4)                                                   | 241.0 (5)                    |
| 26  | AT5G20830.1,AT5G20830.2                                                 | SUCROSE SYNTHASE 1 (SUS1)                                                   | 241.0 (7)                    |
| 27  | AT5G28000.1                                                             | Polyketide cyclase/dehydrase and lipid transport superfamily protein        | 230.0 (1)                    |
| 28  | AT5G49190.1                                                             | SUCROSE SYNTHASE 2 (SUS2)                                                   | 224.0 (2)                    |
| 29  | AT4G02280.1                                                             | SUCROSE SYNTHASE 3 (SUS3)                                                   | 224.0 (5)                    |
| 30  | AT1G79270.1,AT5G61020.1,AT5G61020.2                                     | Evolutionarily conserved C-terminal region 8 (ECT8)                         | 219.0 (3)                    |
| 31  | AT4G19045.1,AT5G45550.1                                                 | MOB kinase activator-like 1 (MOB1-LIKE)                                     | 201.0 (2)                    |
| 32  | AT1G76860.1                                                             | Small nuclear ribonucleoprotein family protein (LSM3B)                      | 200.0 (3)                    |
| 33  | AT1G60110.1                                                             | Mannose-binding lectin superfamily protein                                  | 193.0 (2)                    |
| 34  | AT1G60130.1                                                             | Mannose-binding lectin superfamily protein                                  | 193.0 (2)                    |
| 35  | AT3G53510.1                                                             | ABC-2 type transporter family protein (ABCG20)                              | 184.0 (4)                    |
| 36  | AT1G78370.1                                                             | glutathione S-transferase TAU 20 (GSTU20)                                   | 176.0 (2)                    |
| 37  | AT1G21190.1                                                             | Small nuclear ribonucleoprotein family protein (LSM3A)                      | 175.0 (3)                    |
| 38  | AT2G18740.1,AT2G18740.2,AT4G30330.1                                     | Small nuclear ribonucleoprotein family protein                              | 172.0 (2)                    |
| 39  | AT4G34200.1                                                             | D-3-phosphoglycerate dehydrogenase 1 (PGDH1)                                | 163.0 (6)                    |
| 40  | AT5G22440.1,AT5G22440.2                                                 | Ribosomal protein L1p/L10e family (RL10e)                                   | 160.0 (4)                    |
| 41  | AT5G26860.1                                                             | lon protease 1 (LON1)                                                       | 153.0 (4)                    |
| 42  | AT1G76950.1                                                             | Regulator of chromosome condensation (RCC1) family (PRAF1)                  | 151.0 (4)                    |
| 43  | AT2G39730.1,AT2G39730.2,AT2G39730.3                                     | Rubisco activase (RCA)                                                      | 145.0 (4)                    |
| 44  | AT2G16440.1                                                             | Minichromosome maintenance (MCM2/3/5) family protein (MCM4)                 | 140.0 (4)                    |
| 45  | AT3G54640.1                                                             | Tryptophan synthase alpha chain (TSA1, TRP3)                                | 123.0 (3)                    |
| 46  | AT2G35120.1                                                             | Single hybrid motif superfamily protein                                     | 118.0 (2)                    |
| 47  | AT4G04730.1                                                             | Unknown protein                                                             | 118.0 (4)                    |
| 48  | AT2G17130.1,AT2G17130.2,AT4G35260.1                                     | Isocitrate dehydrogenase subunit (IDH)                                      | 111.0 (3)                    |
| 49  | AT5G64140.1                                                             | Ribosomal protein S28 (RPS28)                                               | 110.0 (1)                    |
| 50  | AT3G45450.1,AT3G48870.1,AT3G48870.2                                     | ClpC-like protein                                                           | 108.0 (2)                    |
| 51  | AT1G75600.1                                                             | Histone superfamily protein (HTR14)                                         | 107.0 (3)                    |
| 52  | AT2G23420.1,AT4G36940.1                                                 | Nicotinate phosphoribosyltransferase (NAPRT)                                | 107.0 (5)                    |
| 53  | AT5G46560.1                                                             | Inner nuclear membrane protein (MAN1)                                       | 107.0 (3)                    |
| 54  | AT1G27280.1                                                             | Paired amphipathic helix (PAH2) superfamily protein                         | 107.0 (2)                    |
| 55  | AT3G24080.1,AT3G24080.2                                                 | KRR1 family protein                                                         | 104.0 (1)                    |
| 56  | AT4G27070.1                                                             | Tryptophan synthase beta-subunit 2 (TSB2)                                   | 102.0 (3)                    |
| 57  | AT1G64440.1                                                             | UDP-GLUCOSE 4-EPIMERASE (RHD1, REB1, UGE4)                                  | 100.0 (3)                    |
| 58  | AT3G22960.1                                                             | Pyruvate kinase family protein (PKP1, PKP-ALPHA)                            | 95.0 (7)                     |
| 59  | AT3G60750.1,AT3G60750.2                                                 | Transketolase (TKL1)                                                        | 92.0 (4)                     |
| 60  | AT1G20950.1,AT1G76550.1                                                 | Phosphofructokinase family protein                                          | 90.0 (3)                     |
| 61  | AT5G49030.1,AT5G49030.2,AT5G49030.3                                     | tRNA synthetase class I (I, L, M and V) family protein (OVA2)               | 87.0 (10)                    |
| 62  | AT3G03120.1                                                             | ADP-ribosylation factor B1C (ARFB1C)                                        | 84.0 (2)                     |
| 63  | AT5G17060.1                                                             | ADP-ribosylation factor B1B (ARFB1B)                                        | 84.0 (3)                     |
| 64  | AT5G60930.1                                                             | P-loop containing nucleoside triphosphate hydrolases superfamily protein    | 83.0 (7)                     |
| 65  | AT3G55510.1                                                             | Noc2p family (RBL)                                                          | 81.0 (1)                     |
| 66  | AT3G25820.2                                                             | Terpene synthase-like sequence-1,8-cineole (TPS-CIN)                        | 79.0 (1)                     |
| 67  | AT1G12920.1,AT5G47880.1,AT5G47880.2                                     | Eukaryotic release factor 1 (ERF1)                                          | 79.0 (4)                     |
| 68  | AT4G08320.1,AT4G08320.2                                                 | Tetratricopeptide repeat (TPR)-like superfamily protein (TPR8)              | 75.0 (1)                     |
| 69  | AT2G10260.1,AT2G10260.2                                                 | unknown protein, similar to Ulp1 protease family protein (TAIR:AT5G45570.1) | 74.0 (3)                     |
| 70  | AT5G30510.1                                                             | Ribosomal protein S1 (RPS1)                                                 | 70.0 (3)                     |
| 71  | AT1G50770.1                                                             | Aminotransferase-like, plant mobile domain family protein                   | 68.0 (4)                     |
| 72  | AT1G01950.1,AT1G01950.2,AT1G01950.3                                     | Armadillo repeat kinesin 2 (ARK2)                                           | 63.0 (2)                     |
| 73  | AT1G59990.1                                                             | EMBRYO DEFECTIVE 3108, DEAD-box ATP-dependent RNA helicase 22               | 61.0 (3)                     |
| 74  | AT4G40020.1                                                             | Myosin heavy chain-related protein                                          | 61.0 (3)                     |
| 75  | AT3G50240.1                                                             | Kinesin-related protein (KICP-02)                                           | 61.0 (5)                     |
| 76  | AT3G44716.1,AT3G44716.2                                                 | unknown protein                                                             | 61.0 (1)                     |
| 77  | AT2G17930.1                                                             | Phosphatidylinositol 3- and 4-kinase family protein with FAT domain         | 60.0 (8)                     |
| 78  | AT1G30440.1                                                             | Phototropic-responsive NPH3 family protein                                  | 60.0 (3)                     |
| 79  | AT5G22450.1                                                             | unknown protein                                                             | 57.0 (6)                     |
| 80  | AT4G32820.1,AT4G32820.2                                                 | CALCINEURIN BINDING PROTEIN 1 (CABIN1)                                      | 57.0 (5)                     |
| 81  | AT4G36760.1                                                             | Aminopeptidase P1 (APP1)                                                    | 54.0 (3)                     |
| 82  | AT1G15690.1,AT1G15690.2                                                 | Inorganic H pyrophosphatase family protein (AVP1, AVP-3)                    | 54.0 (1)                     |
| 83  | AT5G61950.1                                                             | Ubiquitin carboxyl-terminal hydrolase-related protein                       | 53.0 (7)                     |
| 84  | AT1G06590.1                                                             | unknown protein                                                             | 51.0 (3)                     |
| 85  | ATMG00090.1                                                             | ribosomal protein S3 (RS3)                                                  | 47.0 (2)                     |
| 86  | AT5G58530.1                                                             | Glutaredoxin family protein                                                 | 47.0 (1)                     |
| 87  | AT1G11990.1                                                             | O-fucosyltransferase family protein                                         | 47.0 (4)                     |
| 88  | AT3G06720.1,AT3G06720.2,AT4G16143.1,AT4G16143.2                         | importin alpha isoform (IMPA)                                               | 46.0 (1)                     |
| 89  | AT2G36720.1                                                             | Acyl-CoA N-acyltransferase with RING/FYVE/PHD-type zinc finger domain       | 46.0 (3)                     |
| 90  | AT3G48190.1                                                             | PCD IN MALE GAMETOGENESIS 1 (PIG1)                                          | 46.0 (15)                    |
| 91  | AT3G44050.1                                                             | P-loop containing nucleoside triphosphate hydrolases superfamily protein    | 45.0 (7)                     |
| 92  | AT1G12470.1                                                             | zinc ion binding protein                                                    | 45.0 (2)                     |
| 93  | AT5G08390.1                                                             | Transducin/WD40 repeat-like superfamily protein                             | 45.0 (5)                     |
| 94  | AT1G48300.1                                                             | Diacylglycerol acyltransferase 3 (DGAT3)                                    | 45.0 (2)                     |
| 95  | AT5G23340.1                                                             | RNI-like superfamily protein                                                | 43.0 (1)                     |
| 96  | AT3G01310.1,AT3G01310.2                                                 | Arabidopsis homolog protein of yeast VIP1 1                                 | 43.0 (4)                     |
| 97  | AT5G15070.1,AT5G15070.2                                                 | Arabidopsis homolog protein of yeast VIP1 2                                 | 43.0 (3)                     |
| 98  | AT3G53940.1                                                             | Mitochondrial substrate carrier family protein                              | 42.0 (2)                     |
| 99  | AT4G35350.1                                                             | Xylem cysteine peptidase 1 (XCP1)                                           | 41.0 (2)                     |
| 100 | AT5G35604.1                                                             | similar to: myosin heavy chain-related (TAIR:AT5G32590.1)                   | 39.0 (4)                     |
| 101 | AT1G67120.1                                                             | Midasin                                                                     | 38.0 (18)                    |
| 102 | AT3G10220.1                                                             | EMBRYO DEFECTIVE 2804, tubulin folding cofactor B                           | 35.0 (2)                     |
| 103 | AT3G04960.1,AT3G04960.2,AT3G04960.3,AT3G04960.4                         | Domain of unknown function (DUF3444)                                        | 35.0 (2)                     |
| 104 | AT4G15360.1                                                             | cytochrome P450, family 705, subfamily A, polypeptide 3 (CYP705A3)          | 34.0 (8)                     |
| 105 | AT3G54050.1,AT3G54050.2                                                 | High cyclic electron flow 1 (HCEF1)                                         | 34.0 (1)                     |
| 106 | AT1G54460.1                                                             | TPX2 (targeting protein for Xkdp2) protein family                           | 33.0 (1)                     |
| 107 | AT2G36460.1,AT2G36460.2                                                 | Aldolase superfamily protein                                                | 33.0 (1)                     |
| 108 | AT4G29640.1                                                             | Cytidine/deoxycytidylate deaminase family protein                           | 32.0 (4)                     |
| 109 | AT1G48240.1,AT3G17440.1,AT3G17440.2                                     | novel plant snare 12 (NPSN12)                                               | 31.0 (2)                     |
| 110 | AT5G05320.1                                                             | FAD/NAD(P)-binding oxidoreductase family protein                            | 30.0 (1)                     |
| 111 | AT4G28630.1                                                             | ABC transporter of the mitochondrion 1 (ATM1)                               | 29.0 (1)                     |
| 112 | AT1G16400.1                                                             | cytochrome P450, family 79, subfamily F, polypeptide 2 (CYP79F2)            | 29.0 (2)                     |
| 113 | AT5G61150.1,AT5G61150.2                                                 | VERNALIZATION INDEPENDENCE 4 (VIP4)                                         | 28.0 (4)                     |
| 114 | AT2G38720.1                                                             | Microtubule-associated protein 65-5 (MAP65-5)                               | 28.0 (1)                     |
| 115 | AT1G67950.2                                                             | RNA-binding (RRM/RBD/RNP motifs) family protein                             | 25.0 (2)                     |
| 116 | AT1G16760.1                                                             | Protein kinase protein with adenine nucleotide alpha hydrolases-like domain | 23.0 (7)                     |
| 117 | AT1G79190.1                                                             | ARM repeat superfamily protein                                              | 23.0 (7)                     |
| 118 | AT5G37010.1                                                             | unknown protein                                                             | 16.0 (3)                     |

The results in the list of protein families were obtained on the basis of a comparison of the masses of obtained peptides and their fragments with those of the TAIR10 database, using the MASCOT program in combination with the MScan software (<http://proteom.ibb.waw.pl/mscan/index.html>). 118 proteins were identified in the interactome studied, of which 5 represented canonical Sm proteins (SmD1a, SmD1b, SmD3, SmD3b, SmB). Interestingly, there was a trend similar to the results obtained for mRNA identified by RIP-seq. A significant part of the cytoplasmic Sm interaction was the ribosome-related / translational proteins (eIF2 / IF5 translation initiators, RL10e ribosome structural proteins, RS1, RS3, OVA2 tNA RNase synthase), mitochondria (SHM1 and SHM2 methyltransferases, IDH isocitrate dehydrogenase, ABC ATM1 transporters) and plastids / photosynthesis (RuBisCO RCA asset, TKL1 transketolase). In addition, 2 families of mRNA binding proteins: Alba and ECT were identified.

**Supplementary Table 2 The cytoplasmic Sm proteins interactome.  
The results in the list of protein families.**

| locus                               | protein                                                       | score (# of unique peptides) |
|-------------------------------------|---------------------------------------------------------------|------------------------------|
| AT1G29250.1,AT2G34160.1             | Alba DNA/RNA-binding protein                                  | 650.0 (4)                    |
| AT3G04620.1                         | Alba DNA/RNA-binding protein                                  | 650.0 (3)                    |
| AT4G19045.1,AT5G45550.1             | MOB kinase activator-like 1 (MOB1-LIKE)                       | 201.0 (2)                    |
| AT3G53510.1                         | ABC-2 type transporter family protein (ABCG20)                | 184.0 (4)                    |
| AT4G34200.1                         | D-3-phosphoglycerate dehydrogenase 1 (PGDH1)                  | 163.0 (6)                    |
| AT1G76950.1                         | Regulator of chromosome condensation (RCC1) family (PRAF1)    | 151.0 (4)                    |
| AT3G55510.1                         | Noc2p family (RBL)                                            | 81.0 (1)                     |
| AT1G15690.1,AT1G15690.2             | Inorganic H pyrophosphatase family protein (AVP1, AVP-3)      | 54.0 (1)                     |
| AT1G06590.1                         | unknown protein                                               | 51.0 (3)                     |
| AT3G48190.1                         | PCD IN MALE GAMETOGENESIS 1 (PIG1)                            | 46.0 (15)                    |
| AT5G15070.1,AT5G15070.2             | Arabidopsis homolog protein of yeast VIP1 2                   | 43.0 (3)                     |
| AT5G61150.1,AT5G61150.2             | VERNALIZATION INDEPENDENCE 4 (VIP4)                           | 28.0 (4)                     |
| AT3G07920.1                         | Translation initiation factor IF2/IF5                         | 258.0 (2)                    |
| AT5G22440.1,AT5G22440.2             | Ribosomal protein L1p/L10e family (RL10e)                     | 160.0 (4)                    |
| AT5G64140.1                         | Ribosomal protein S28 (RPS28)                                 | 110.0 (1)                    |
| AT5G49030.1,AT5G49030.2,AT5G49030.3 | tRNA synthetase class I (I, L, M and V) family protein (OVA2) | 87.0 (10)                    |
| AT1G12920.1,AT5G47880.1,AT5G47880.2 | Eukaryotic release factor 1 (ERF1)                            | 79.0 (4)                     |
| AT5G30510.1                         | Ribosomal protein S1 (RPS1)                                   | 70.0 (3)                     |
| AT1G50770.1                         | Aminotransferase-like, plant mobile domain family protein     | 68.0 (4)                     |
| ATMG00090.1                         | ribosomal protein S3 (RS3)                                    | 47.0 (2)                     |
| AT1G67120.1                         | Midasin                                                       | 38.0 (18)                    |
| AT5G26780.1,AT5G26780.2,AT5G26780.3 | Serine hydroxymethyltransferase 2 (SHM2)                      | 1104.0 (7)                   |
| AT5G26860.1                         | Ion protease 1 (LON1)                                         | 153.0 (4)                    |
| AT2G35120.1                         | Single hybrid motif superfamily protein                       | 118.0 (2)                    |
| AT2G17130.1,AT2G17130.2,AT4G35260.1 | Isocitrate dehydrogenase subunit (IDH)                        | 111.0 (3)                    |
| AT3G53940.1                         | Mitochondrial substrate carrier family protein                | 42.0 (2)                     |
| AT4G28630.1                         | ABC transporter of the mitochondrion 1 (ATM1)                 | 29.0 (1)                     |
| AT2G36250.1,AT2G36250.2             | Tubulin/FtsZ family protein (FTSZ2-1)                         | 439.0 (5)                    |
| AT3G52750.1                         | Tubulin/FtsZ family protein (FTSZ2-2)                         | 326.0 (3)                    |
| AT2G45290.1                         | Transketolase 2 (TKL2)                                        | 290.0 (4)                    |
| AT1G26230.1                         | Chaperonin 60 subunit beta 4 (CPN-60 beta 4)                  | 273.0 (2)                    |
| AT1G26230.2                         | Chaperonin 60 subunit beta 4 (CPN-60 beta 4)                  | 273.0 (3)                    |
| AT4G00620.1                         | EMBRYO DEFECTIVE 3127 (EMB3127)                               | 272.0 (2)                    |
| AT4G00600.1                         | EMBRYO DEFECTIVE 3127 (EMB3127)                               | 272.0 (2)                    |
| AT2G04842.1                         | EMBRYO DEFECTIVE 2761 (EMB2761)                               | 248.0 (4)                    |
| AT3G43190.1                         | SUCROSE SYNTHASE 4 (SUS4)                                     | 241.0 (5)                    |
| AT5G20830.1,AT5G20830.2             | SUCROSE SYNTHASE 1 (SUS1)                                     | 241.0 (7)                    |
| AT5G49190.1                         | SUCROSE SYNTHASE 2 (SUS2)                                     | 224.0 (2)                    |
| AT4G02280.1                         | SUCROSE SYNTHASE 3 (SUS3)                                     | 224.0 (5)                    |
| AT2G39730.1,AT2G39730.2,AT2G39730.3 | Rubisco activase (RCA)                                        | 145.0 (4)                    |
| AT3G54640.1                         | Tryptophan synthase alpha chain (TSA1, TRP3)                  | 123.0 (3)                    |
| AT4G04730.1                         | Unknown protein                                               | 118.0 (4)                    |
| AT4G27070.1                         | Tryptophan synthase beta-subunit 2 (TSB2)                     | 102.0 (3)                    |
| AT3G22960.1                         | Pyruvate kinase family protein (PKP1, PKP-ALPHA)              | 95.0 (7)                     |
| AT3G60750.1,AT3G60750.2             | Transketolase (TKL1)                                          | 92.0 (4)                     |
| AT3G25820.2                         | Terpene synthase-like sequence-1,8-cineole (TPS-CIN)          | 79.0 (1)                     |
| AT1G59990.1                         | EMBRYO DEFECTIVE 3108, DEAD-box ATP-dependent RNA h           | 61.0 (3)                     |
| AT5G22450.1                         | unknown protein                                               | 57.0 (6)                     |
| AT3G54050.1,AT3G54050.2             | High cyclic electron flow 1 (HCEF1)                           | 34.0 (1)                     |
| AT1G67950.2                         | RNA-binding (RRM/RBD/RNP motifs) family protein               | 25.0 (2)                     |
